# Supplementary material
Source: PubMed Central journal article supplement (PMC1740810)
Supplement: oenvmed_61_7_643__1.pdf [file oenvmed_61_7_643__1.pdf]

## Web-only References

Aldana S. Financial impact of worksite health promotion and methodological quality of the evidence. In: Chapman L, ed. *The art of health promotion newsletter*. *Am J Health Promot* 1998;**2**:1–8.

Davies JK, Macdonald G, eds. *Quality, evidence and effectiveness in health promotion: striving for certainties*. London: Routledge, 1998.

Goetzel RZ, Jacobson BH, Aldana SG, *et al*. Health care costs of worksite health promotion participants and non-participants. *J Occup Environ Med* 1998;**40**:341–6.

Heaney CA, Goetzel RZ. A review of health-related outcomes of multi-component worksite health promotion programs. *Am J Health Promot* 1997;**11**:290–307.

Shephard RJ. Do work-site exercise and health programs work? *Physician and Sportsmedicine* 1999;**27**:48–72.

Shirasay K, Miyakawa M, Yoshida K, *et al*. New approach in the evaluation of a fitness program at a worksite. *J Occup Environ Med* 1999;**41**:195–201.

Yen LT, Edington DW, Witting P. Corporate medical claim cost distributions and factors associated with high-cost status. *J Occup Med* 1994;**36**:505–15.

Greenberg PE, Sisitsky T, Kessler RC, *et al*. The economic burden of anxiety disorders in the 1990s. *J Clin Psychiatry* 1999;**60**:427–35.

Moncrieff J, Pomerleau J. Trends in sickness benefits in Great Britain and the contribution of mental disorders. *J Public Health Med* 2000;**22**:59–67.

Murphy LR. Stress management in work settings: a critical review of the health effects. *Am J Health Promot* 1996;**11**:112–35.
